# Supplementary material for: Analyte migration electrospray ionization for rapid analysis of complex samples with small volume using mass spectrometry
Source: Royal Society of Chemistry journal article supplement (doi:10.1039/c4an01397b), 2014-01-01
Supplement: c4an01397b1.pdf [file c4an01397b1.pdf]

## Electronic Supplementary Information

### **Analyte Migration Electrospray Ionization for Rapid Analysis of Complex Samples with Small Volume Using Mass Spectrometry**

*Qian Wang,<sup>a</sup> Hanbin Zhong,<sup>a</sup> Yajun Zheng,<sup>a</sup> Sichun Zhang,<sup>b</sup> Xiaoning Liu,<sup>a</sup> Xinrong Zhang,<sup>b</sup> Xiaoling Zhang<sup>a</sup> and Zhiping Zhang\*<sup>a</sup>*

<sup>a</sup> School of Chemistry and Chemical Engineering, Xi'an Shiyou University, Xi'an 710065, China

<sup>b</sup> Department of Chemistry, Tsinghua University, Beijing 100084, China

\*Corresponding authors.

[zhangzp0304@gmail.com](mailto:zhangzp0304@gmail.com) (Z.Z.)

## Experimental Section

All experiments were carried out with a TSQ Quantum Access Max (Thermo Scientific, San Jose, CA), operated in the full mass spectrum mode or selected reaction monitoring (SRM) mode, was used. The specific product ions produced by collision-induced dissociation (CID) were monitored. The Xcalibur software was used for control of the TSQ Quantum Access Max MS system and data acquisition. Argon gas (99.995% purity) was used as collision gas. The temperature MS inlet capillary was 270 °C. The AM-ESI capillary with various tip orifices were pulled from borosilicate glass capillaries with filament (Sutter Instrument, USA, 1.5 mm o.d., 0.86 mm i.d., 10 cm length) using a micropipette puller (Model P-97, Sutter Instrument Co., Novato, CA, USA). The tip orifice was determined with a metallographic microscope equipped with a DCA 10.0 digital camera (1 million resolution). The orifice precision was  $\pm 1 \mu\text{m}$ . The tip orifice size of 1-35  $\mu\text{m}$  was obtained by adjusting the pulling parameters. The procedure for paper spray analysis was similar to the previous reports.<sup>[S-1]</sup> The paper used was Grade 1 chromatography paper purchased from Whatman (Maidstone, England). The blood used was bovine whole blood from Lanzhou Institute of Biological Products Co., Ltd. (Lanzhou, China). For the AM-ESI experiment, the distance between the tip of capillary and MS inlet should be well controlled, and the used distance is around 8 mm. The selected reaction monitoring (SRM) conditions for the quantitative analysis of different drugs in the whole blood is listed in Table S-1.

### References:

[S-1] (a) H. Wang, J. Liu, R. G. Cooks, Ouyang, Z., *Angew. Chem. Int. Ed.* **2010**, *49* (5), 877-880; (b) Z. Zhang, W. Xu, N. E. Manicke, R. G., Cooks, Ouyang, Z., *Anal. Chem.* **2012**, *84* (2), 931-938.

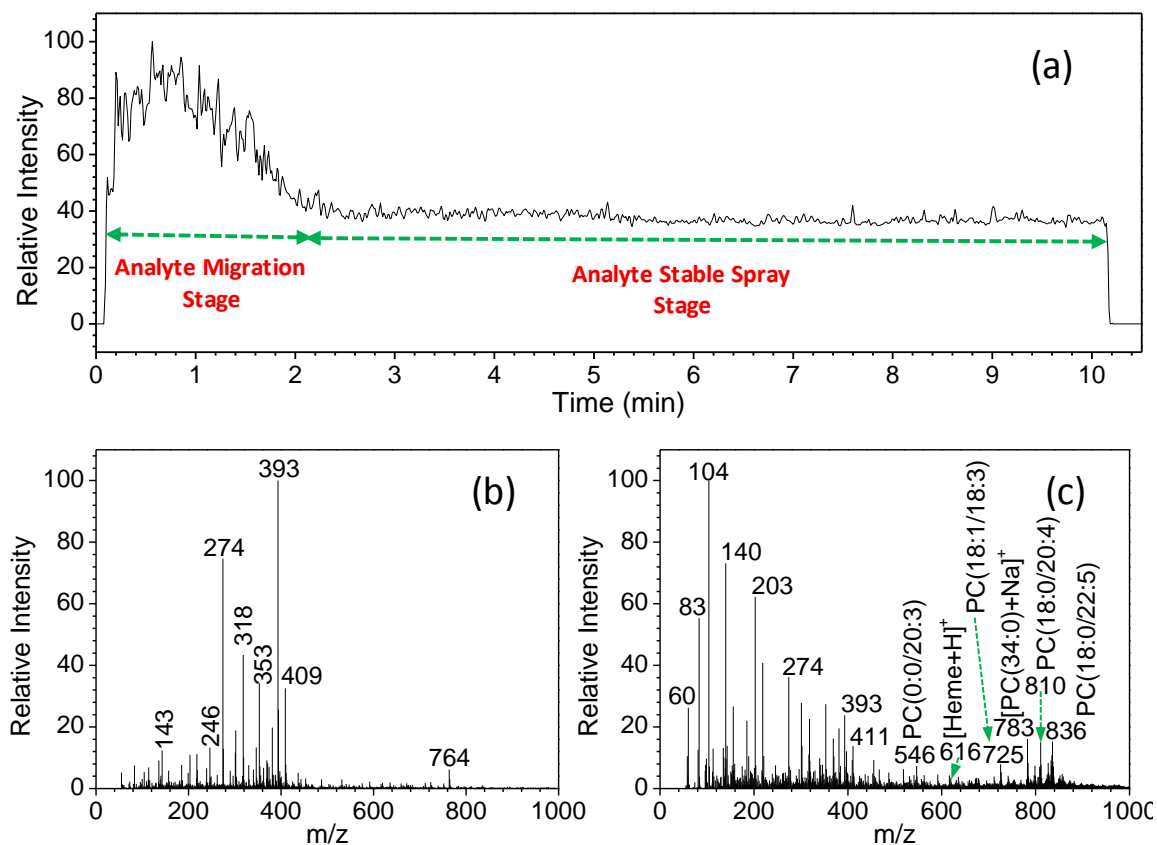

**Fig. S-1** (a) The total ion current chromatogram of fresh blood sample with AM-ESI by applying 2 kV voltage. It includes Analyte Migration Stage and Analyte Stable Spray Stage. The capillary with 20  $\mu\text{m}$  tip orifice containing 2  $\mu\text{L}$  fresh blood and 20  $\mu\text{L}$  methanol before spray, and the blood sample was added into the end of methanol as Figure 1b in the main text. (b) The mass spectrum from the Analyte Migration Stage as shown in (a). The peaks could be assigned as the products from methanol. (c) The mass spectrum from the Analyte Stable Spray Stage as shown in (a). (Note: PC means phosphatidylcholine in (c).)

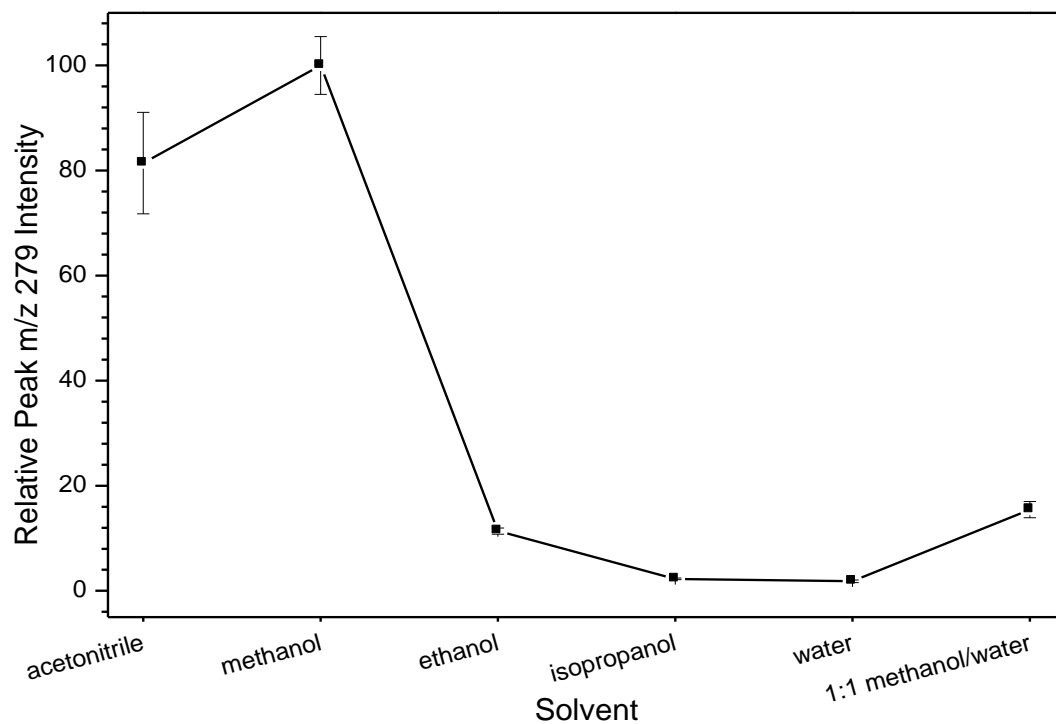

**Fig. S-2** Effect of solvent on the extraction efficiency for analysis of olive oil by AM-ESI, and the peak intensity was evaluated by the peak m/z 279 (linoleic acid) in olive oil. For this analysis, 2  $\mu$ L olive oil sample was added into a capillary containing 20  $\mu$ L methanol, and then -1.5 kV DC voltage was applied.

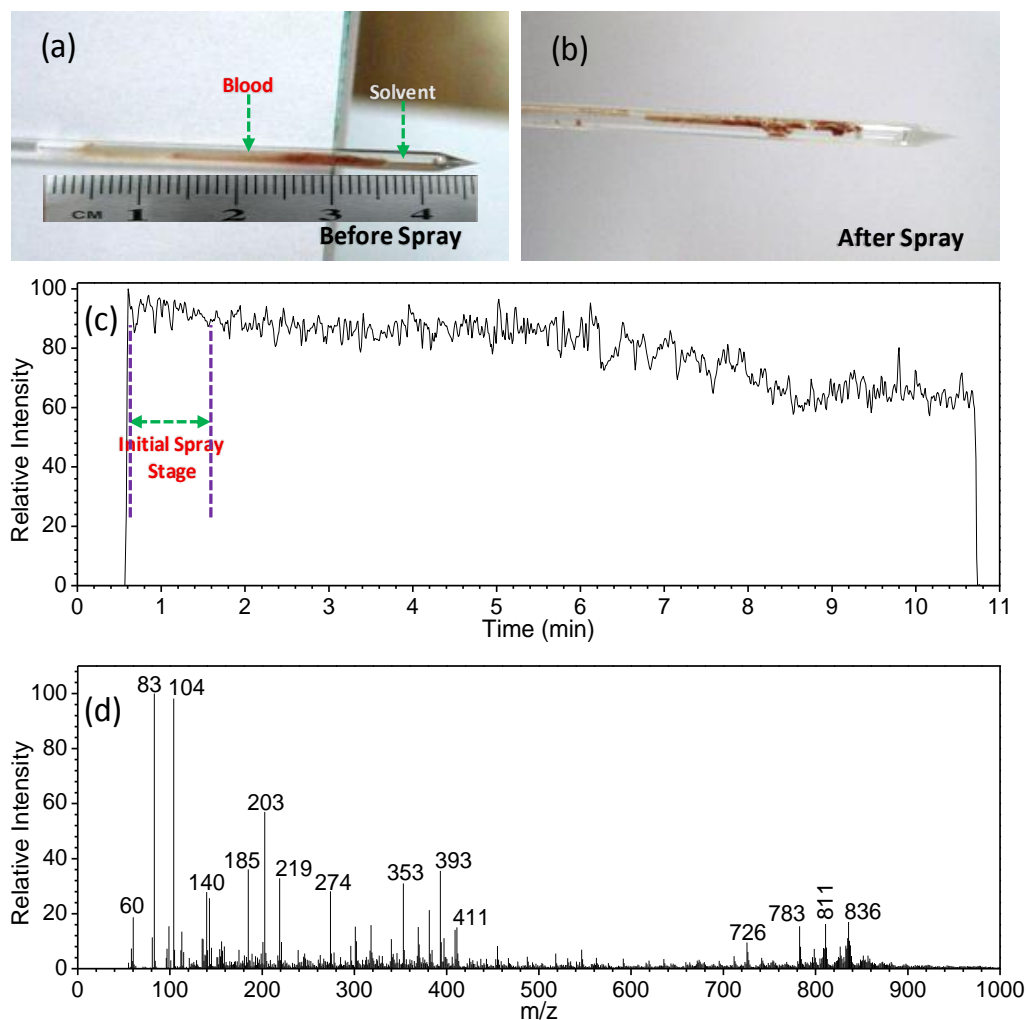

**Fig. S-3** (a) The capillary with 20  $\mu\text{m}$  tip orifice containing 2  $\mu\text{L}$  fresh blood and 20  $\mu\text{L}$  methanol before spray, and the blood sample was added into the solvent methanol 4 - 6 mm away from the capillary tip. (b) The capillary after spray for ca. 10 min. (c) The total ion current chronogram of fresh blood sample with AM-ESI by applying 2 kV voltage. (d) The mass spectrum from the Initial Spray Stage as shown in (c).

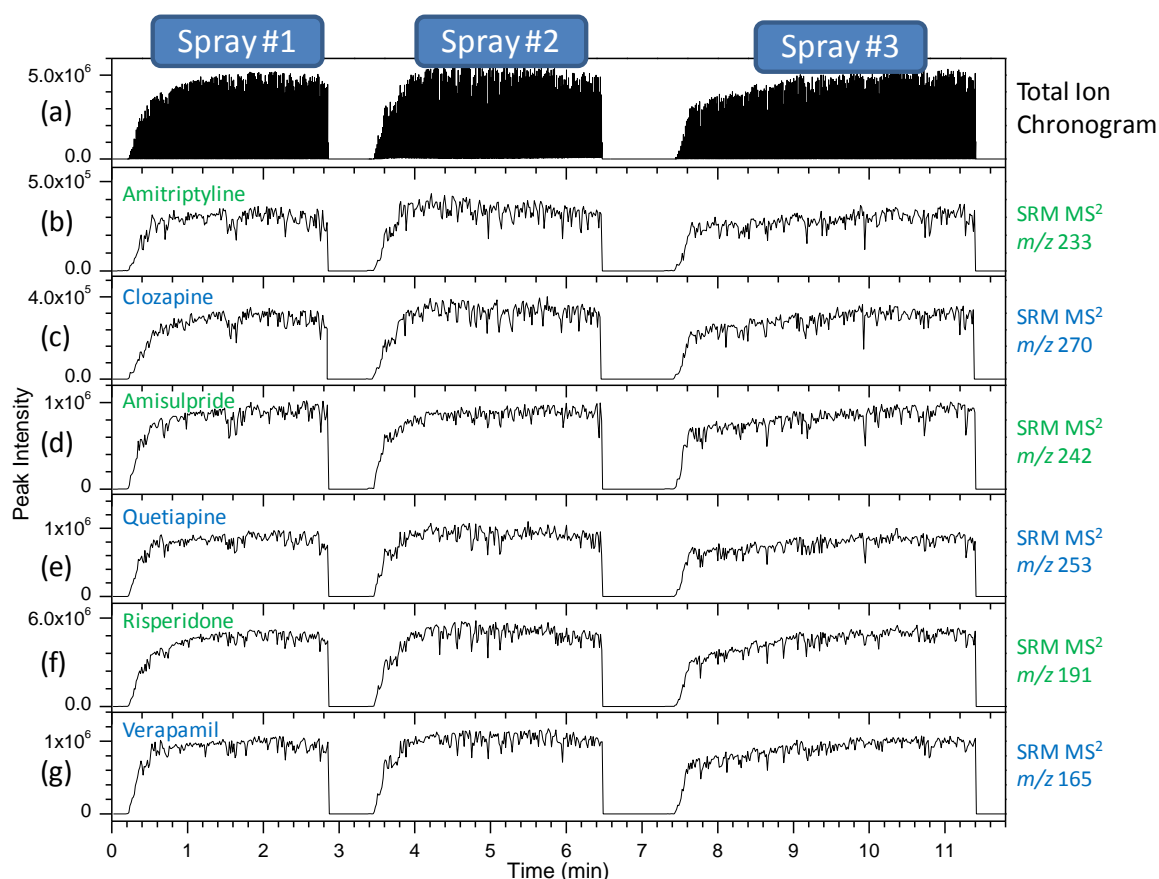

**Fig. S-4** Simultaneous determination of six therapeutic drugs in fresh blood using AM-ESI. Ion chromatograms for (a) total ion current (TIC) and (b) amitriptyline, (c) clozapine, (d) amisulpride, (e) quetiapine, (f) risperidone and (g) verapamil, each at  $1 \mu\text{g mL}^{-1}$  concentration in fresh blood, and selected reaction monitoring (SRM) mode of a Thermo TSQ. Sample amount:  $2 \mu\text{L}$ ; solvent: methanol; solvent volume:  $20 \mu\text{L}$ ; voltage:  $2.0 \text{ kV}$ .

Fig. S-4 shows the simultaneous determination of six therapeutic drugs in fresh blood using AM-ESI ionization source coupled to mass spectrometry. It is obvious that AM-ESI not only benefits from without sample preparation, but also from high-throughput analysis. Also, the analysis repeatability is good enough. The analysis time was mainly spent on the changing of sample, and the sample spray time can be easily adjusted dependent on the real requirement.

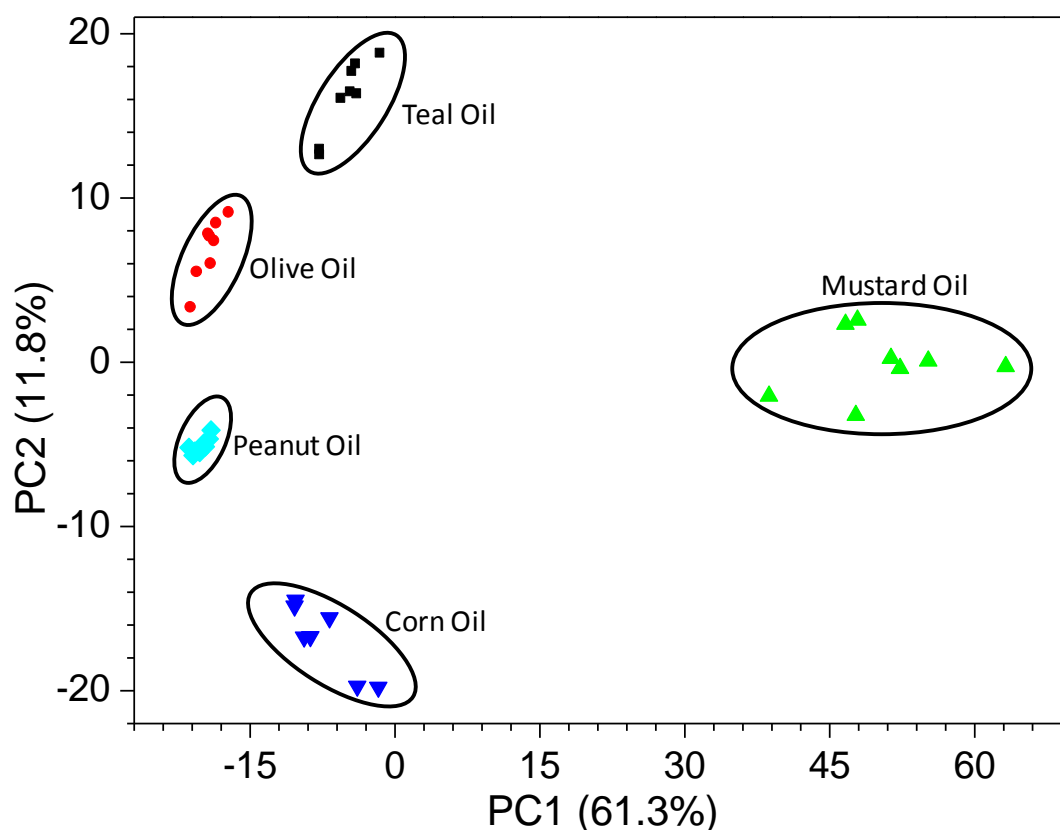

**Fig. S-5** PCA of AM-ESI-mass spectrometry of five oil samples including teal oil, olive oil, peanut oil, corn oil, and mustard oil. For this analysis, 2  $\mu\text{L}$  olive oil sample was added into a capillary containing 20  $\mu\text{L}$  methanol, and then -1.5 kV DC voltage was applied.

Fig. S-5 shows the differential PCA score plot from the all data points in the  $m/z$  range of 50-1,200 from five types of oil samples (8 individual samples), demonstrating the feasibility of AM-ESI-mass spectrometry for rapid discrimination of the different oil samples. Although all data points from the mass spectra of teal oil, olive oil, peanut oil, corn oil, and mustard oil were used, the studied five oil samples can be well discriminated. It suggests that AM-ESI-mass spectrometry can produce abundant fingerprint information of different oils, which effectively avoids the cumbersome selection of the major different peaks for PCA analysis.

**Table S-1.** Selected reaction monitoring (SRM) conditions

| Analyte       | Parent Ion<br>$m/z$ | Fragment<br>Ion $m/z$ | Tube Lens<br>(V) | q2 Offset<br>(V) |
|---------------|---------------------|-----------------------|------------------|------------------|
| Amitriptyline | 278, $[M + H]^+$    | 233                   | 16               | 73               |
| Clozapine     | 327, $[M + H]^+$    | 270                   | 23               | 80               |
| Amisulpride   | 370, $[M + H]^+$    | 242                   | 27               | 87               |
| Quetiapine    | 384, $[M + H]^+$    | 253                   | 22               | 89               |
| Risperidone   | 411, $[M + H]^+$    | 191                   | 27               | 93               |
| Verapamil     | 455, $[M + H]^+$    | 165                   | 26               | 107              |

**Table S-2.** Comparison of the LOQs of different therapeutical drugs in blood samples determined using AM-ESI and PSI ionization sources coupled to TSQ mass spectrometry

| Analyte       | AM-ESI<br>(ng mL <sup>-1</sup> ) | PSI<br>(ng mL <sup>-1</sup> ) |
|---------------|----------------------------------|-------------------------------|
| Amitriptyline | 0.5                              | 5.0                           |
| Clozapine     | 0.1                              | 1.0                           |
| Amisulpride   | 0.5                              | 5.0                           |
| Quetiapine    | 0.5                              | 5.0                           |
| Risperidone   | 0.5                              | 1.0                           |
| Verapamil     | 0.5                              | 5.0                           |

**Table S-3.** Assignment of the main peaks from olive oil from the data in the literature<sup>[S-2]</sup>

| $m/z$ | Compound                                             |
|-------|------------------------------------------------------|
| 121   | [tyrosol + H - H <sub>2</sub> O] <sup>+</sup>        |
| 137   | [hydroxytyrosol + H - H <sub>2</sub> O] <sup>+</sup> |
| 165   | [coumaric acid + H] <sup>+</sup>                     |
| 181   | [caffeic acid + H] <sup>+</sup>                      |
| 195   | [ferulic acid + H] <sup>+</sup>                      |
| 225   | [sinapic acid + H] <sup>+</sup>                      |
| 603   | LO                                                   |
| 645   | OO                                                   |
| 851   | PPO                                                  |
| 875   | PLO                                                  |
| 877   | PLL                                                  |
| 879   | PLO                                                  |
| 899   | LLL <sub>n</sub>                                     |
| 901   | LLL                                                  |
| 903   | LLO                                                  |
| 905   | OOL                                                  |
| 908   | OOO                                                  |
| 910   | SOO                                                  |
| 912   | SSO                                                  |

**Note:** L denotes linoleic acid; O denotes oleic acid; P denotes palmitic acid; S denotes steric acid.

#### References:

- [S-2] (a) R. R. Catharino, R. Haddad, L. G. Cabrini, I. B. S. Cunha, A. C. H. F. Sawaya, M. N. Eberlin, *Anal. Chem.* **2005**, 77, 7429-7433; (b) R. Goodacre, S. Vaidyanathan, G. Bianchi, D. B. Kell, *Analyst* **2002**, 127, 1457-1462; (c) J. O. Lay, R. Liyanage, B. Durham, J. Brooks, *Rapid Commun. Mass Spectrom.* **2006**, 20, 952-958.

**Table S-4.** Assignment of the main peaks from porcine kidney from the data in the literature<sup>[S-3]</sup>

| <i>m/z</i> | Compound                           |
|------------|------------------------------------|
| 255        | [palmitic acid – H] <sup>–</sup>   |
| 279        | [linoleic acid – H] <sup>–</sup>   |
| 281        | [oleic acid – H] <sup>–</sup>      |
| 303        | [arachidonic acid –H] <sup>–</sup> |
| 722        | plasm-PE                           |
| 738        | PE(36:4)                           |
| 766        | PE(38:4)                           |
| 810        | PS(38:4)                           |
| 861        | PI(36:2)                           |
| 885        | PI(38:4)                           |

**Note:** **plasm-PE** denotes plasmalogens; **PE** denotes glycerophosphoethanolamines; **PS** denotes phosphatidylserine; **PI** denotes phosphatidylinositol.

#### References:

[S-3] J. Liu, R. G. Cooks, Z. Ouyang, *Anal. Chem.* **2011**, 83, 9221-9225.

**Table S-5.** Assignment of the main peaks from human hair from the data in the literature<sup>[S-4]</sup>

| <i>m/z</i> | Compound  |
|------------|-----------|
| 512        | N14DS18   |
| 528        | A14DS18   |
| 536        | A16S18    |
| 538        | N16:1DS18 |
| 540        | N16DS18   |
| 548        | N18S18    |
| 568        | N18DS18   |
| 576        | N20S18    |
| 596        | N18DS20   |
| 636        | N23:1DS18 |
| 660        | N26S18    |
| 678        | N26:1DS18 |
| 706        | N28:1DS18 |
| 708        | N28DS18   |
| 734        | N30:1DS18 |

**Note:** The composition of ceramides (CERs) in hair is characterized not only by predominant CER molecules consisting of saturated/unsaturated fatty acid moieties (FAMs) with even numbers of carbon atoms and a C<sub>18</sub> dihydrosphingosine moiety but also by isobaric or isomeric CERs,  $\alpha$ -hydroxy fatty acid-containing CERs, and odd chain-containing CERs. FAM and a dihydrosphingosine moiety (ADS), or a  $\alpha$ -hydroxy FAM and a sphingosine moiety (AS). Based on this terminology, each CER molecule is individually termed as follows: the number of FAM carbon atoms and unsaturation (if present) is expressed after the letter N or A, whereas the number of SPM carbon atoms is expressed after the letter(s) DS or S (e.g., N24:1DS18 for a CER molecule with nervonic acid and C<sub>18</sub> dihydrosphingosine moieties, N18DS20 for stearic acid and C<sub>20</sub> dihydrosphingosine, and A16DS18 for  $\alpha$ -hydroxypalmitic acid and C<sub>18</sub> dihydrosphingosine).

#### References:

[S-4] (a) Y. Masukawa, H. Tsujimura, H. Narita, *J. Lipid Res.* **2006**, *47*, 1559-1571; (b) Y. Masukawa, H. Tsujimura, *J. Chromatogr. A* **2006**, *1127*, 52-59.
